# Supplementary material
Source: publisher figshare collection journal article supplement (https://geolsoc.figshare.com/articles/dataset/_/3454637)

## Plots of Individual Erosion Post Records

- Before making use of the plots shown it should be noted that the data displayed is based on a filtered version of the raw data provided by the East Riding of Yorkshire Council. The filtering that has been undertaken includes:
  - Removal of Erosion Posts with a low number of annual records (fewer than 10) and those with no records taken in recent years, including Posts 112 and 113, which were abandoned in 1980. This is to ensure that the data displayed represents the long term trends and also shows the recent patterns of erosion.
  - The merging of sub-annual records, e.g. combining the erosion figures for March 2000 and September 2000 into one record of 2000, in order to facilitate comparison with the earlier records.
  - The removal of records following periods of no measurement, as these represent multiple years of erosion and can be misleading when displayed alongside the records representing loss over a single year. The exception to this is an occasion where a period of no measurement is followed by a year that registers a value of zero land loss.
  - In order to draw attention to the periods of no data, a value of minus one has been attributed to all years that do not contain a value of annual land loss.
  - The values of minus one have been excluded from the mean, median and percentile calculations performed for each post displayed in this document. The mean, median and percentile values displayed in this document have been calculated based on this filtered dataset and are therefore not representative of the total land lost between 1952 and 2006, but are indicative of the annualised values of recession.

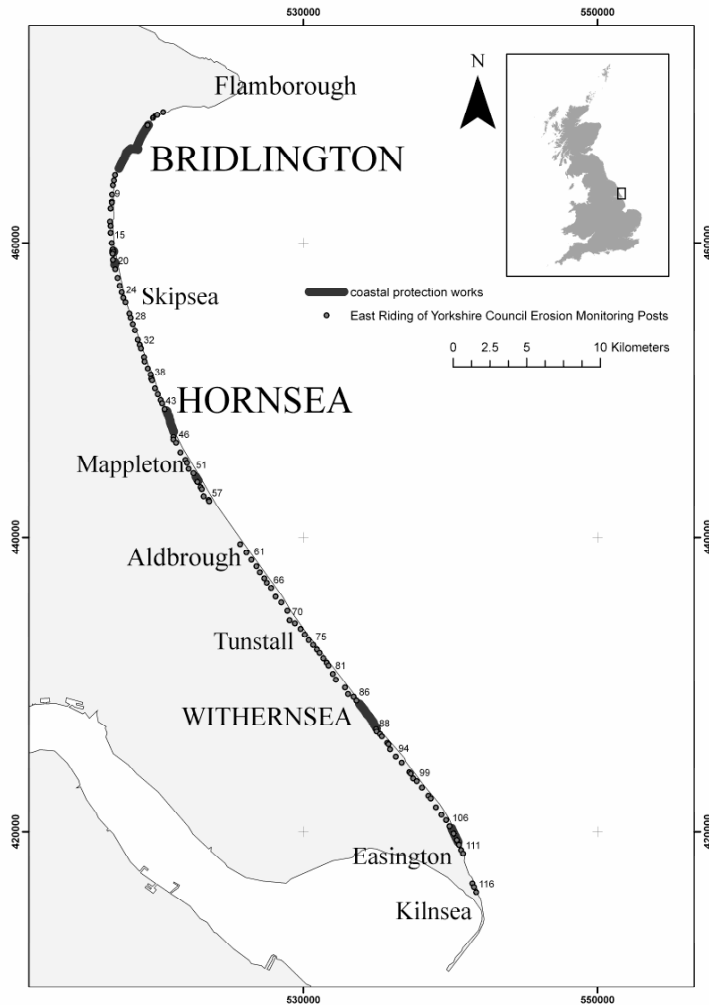

Location plan showing the position of Erosion Posts and coastal protection in relation to the Holderness coastline and the UK

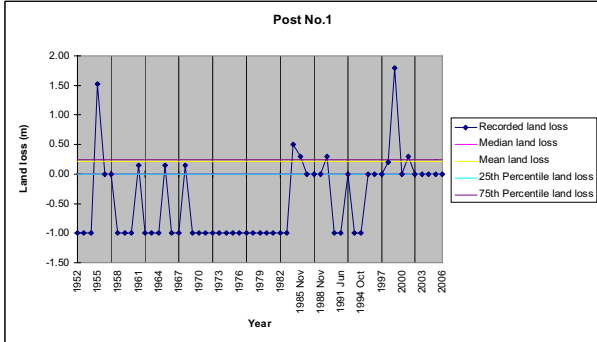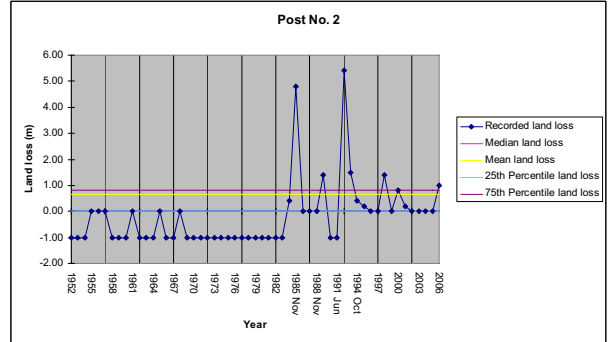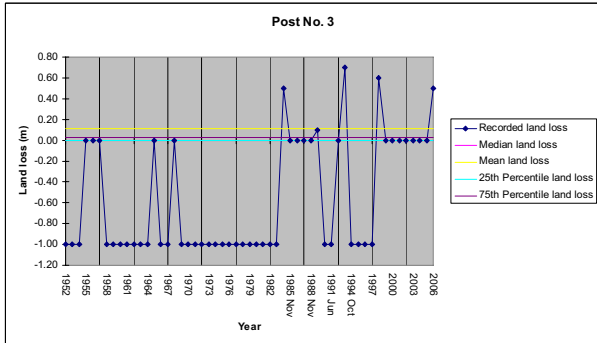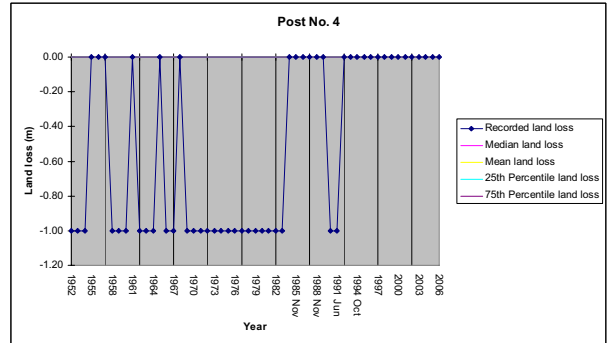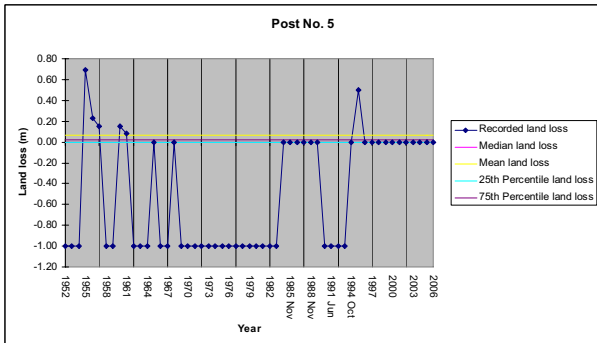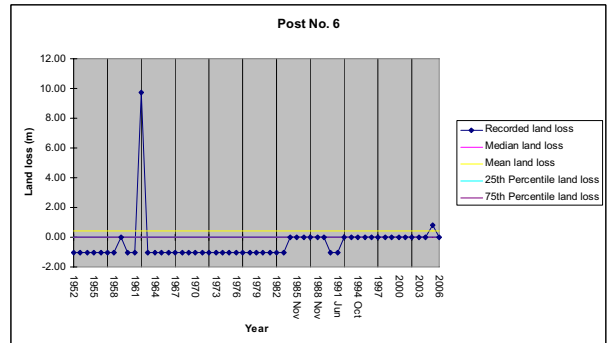

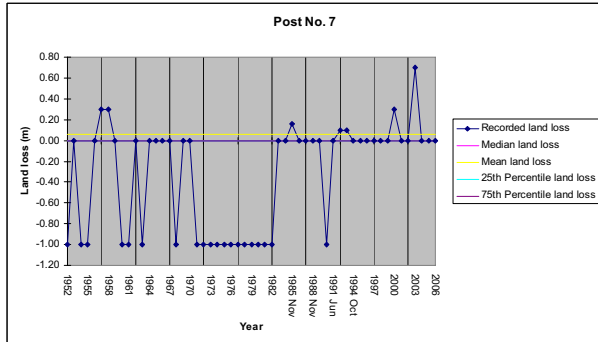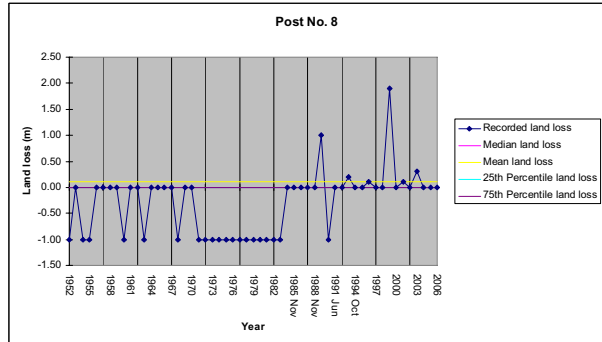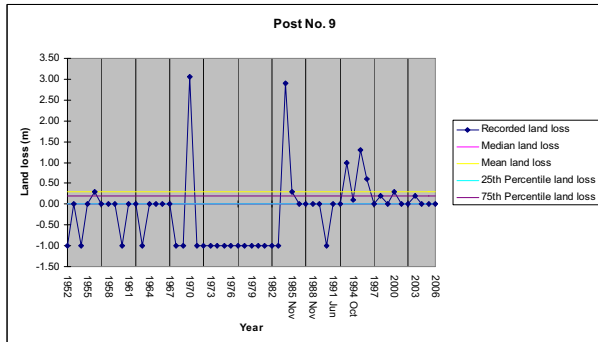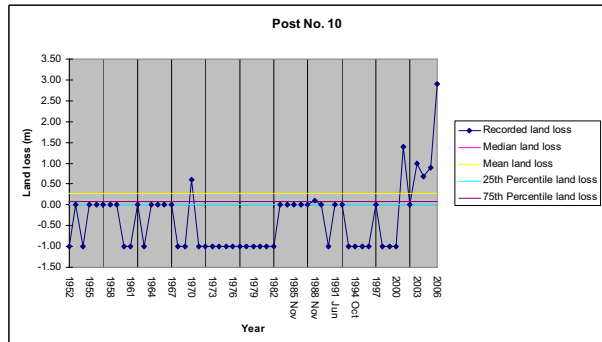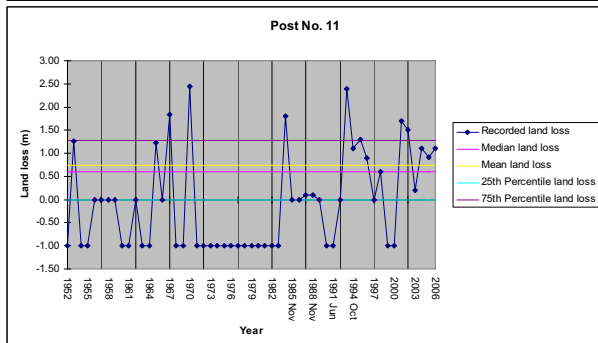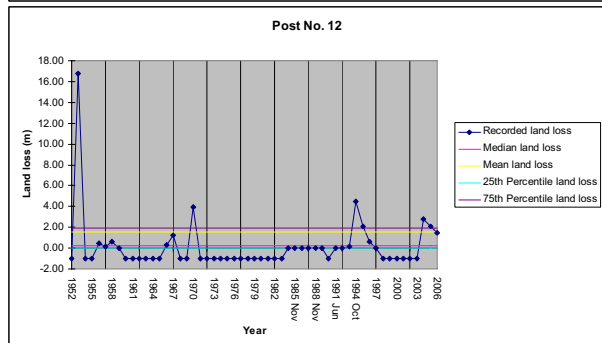

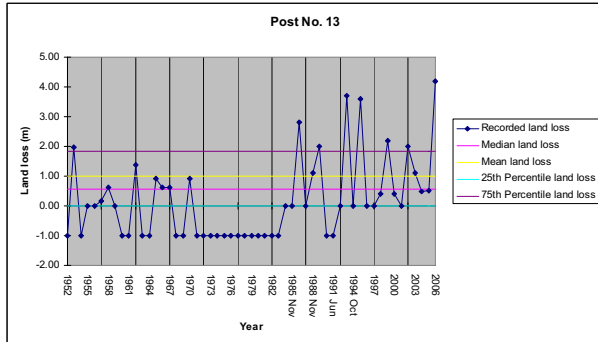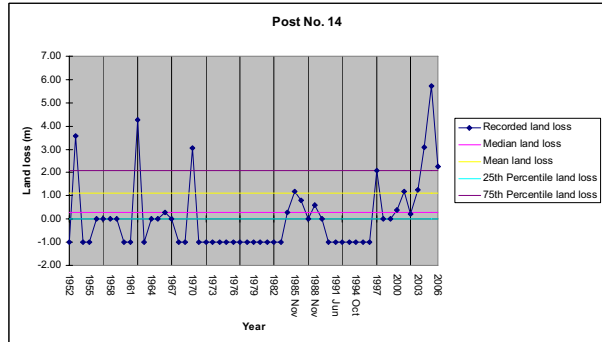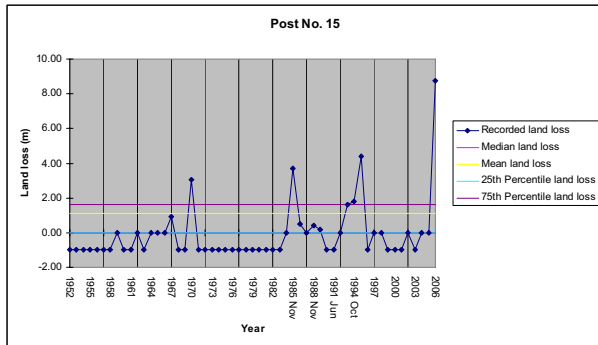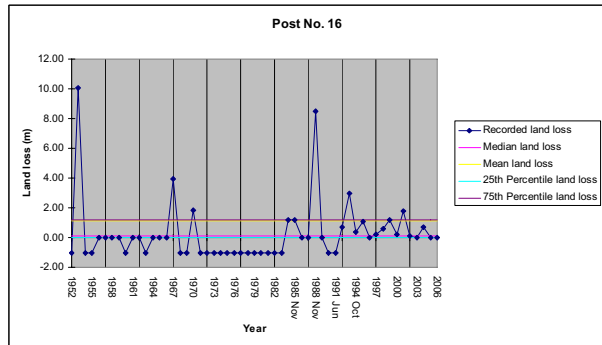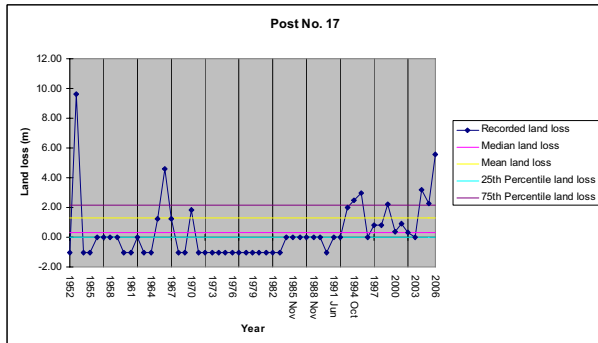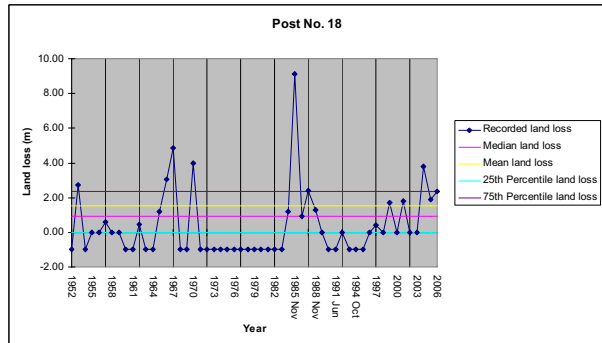

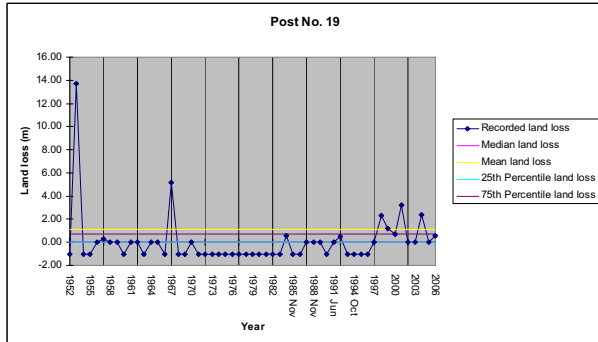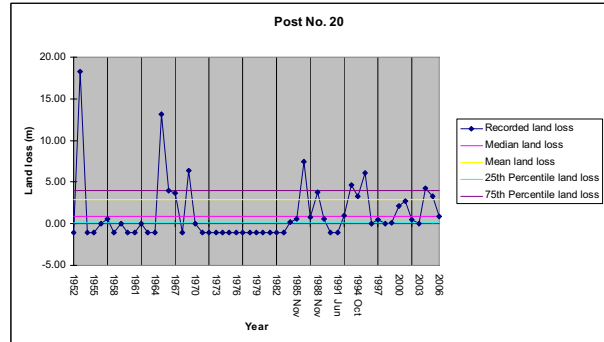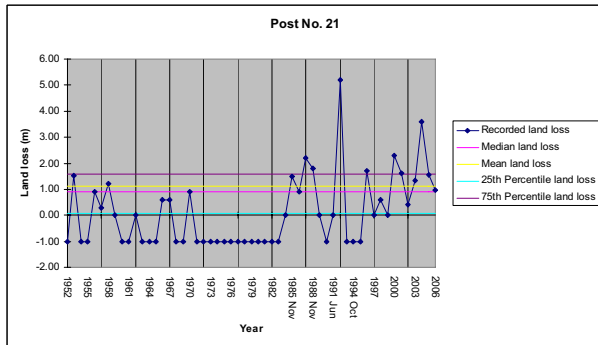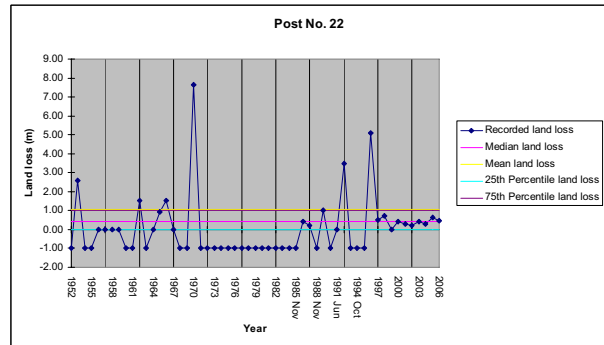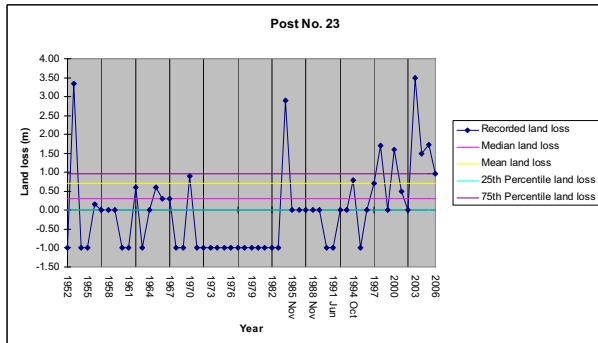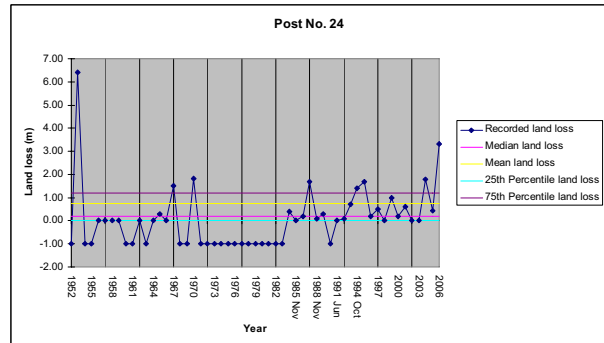

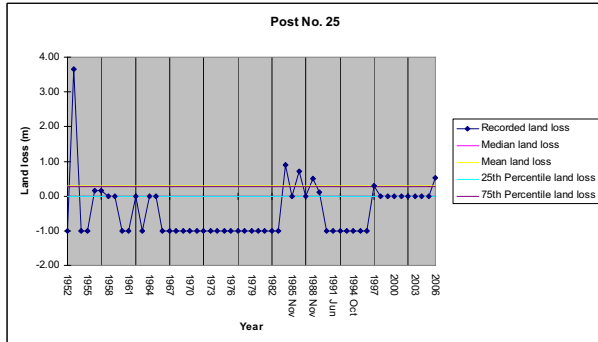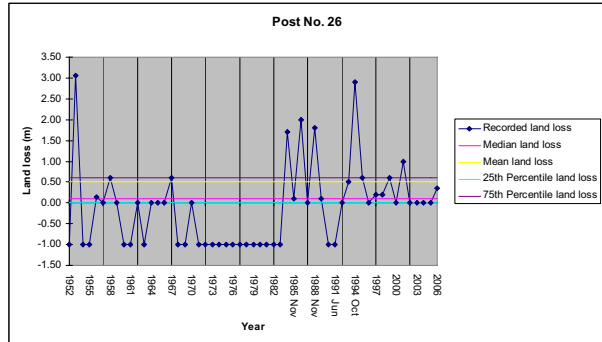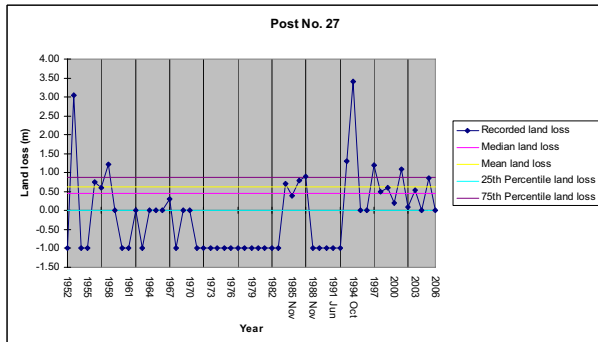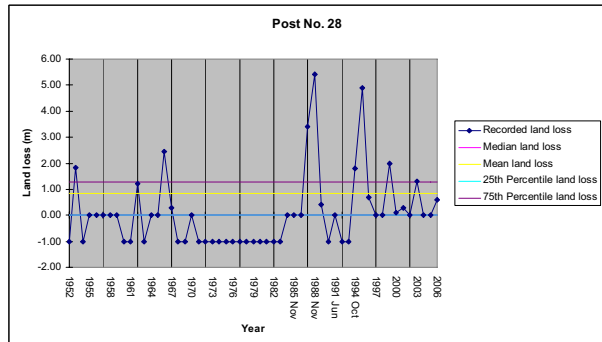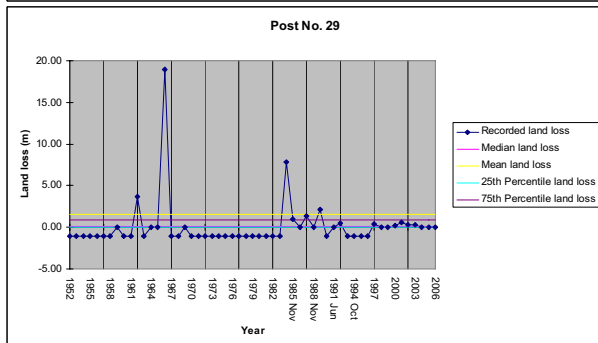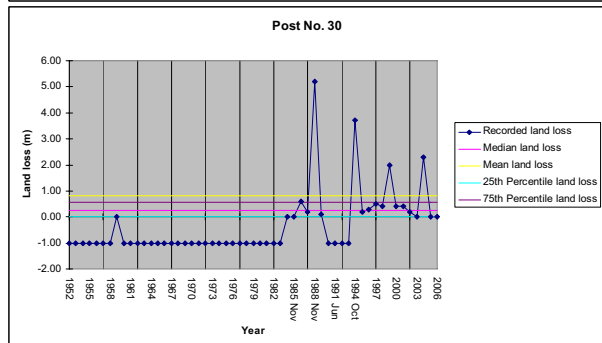

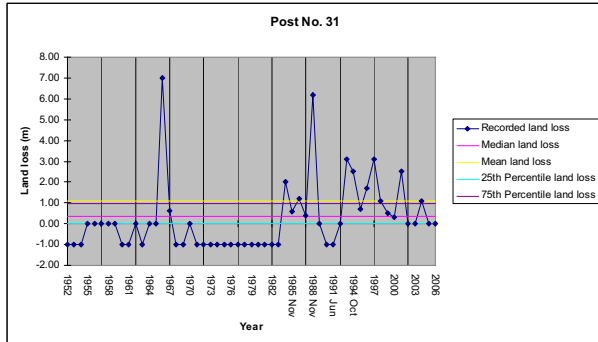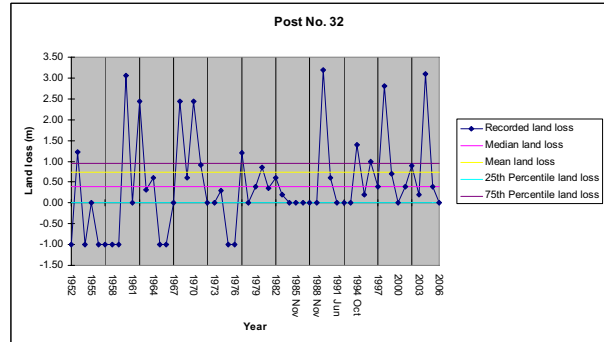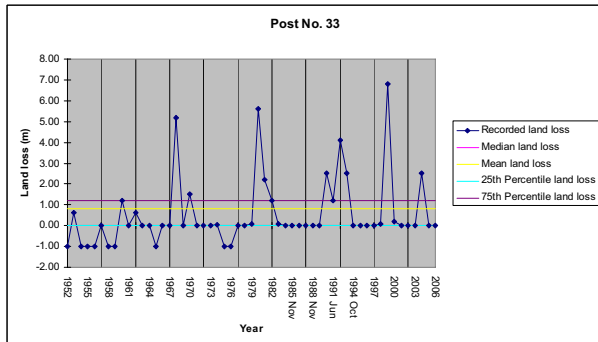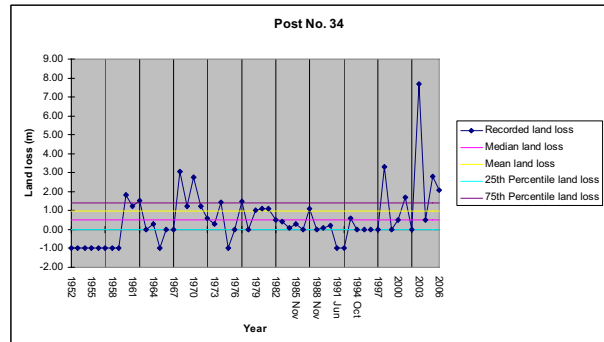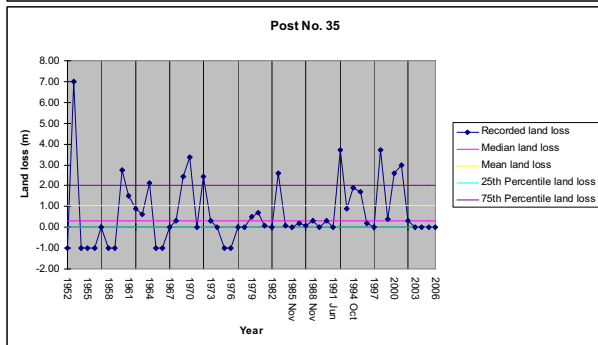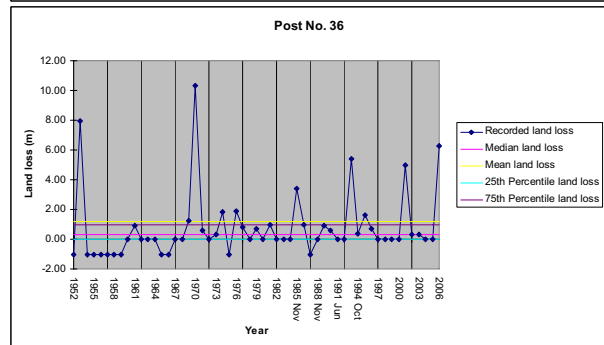



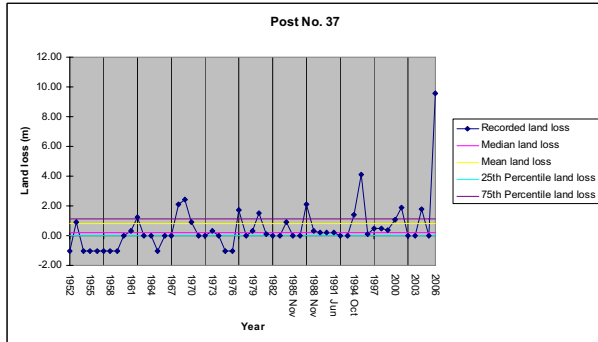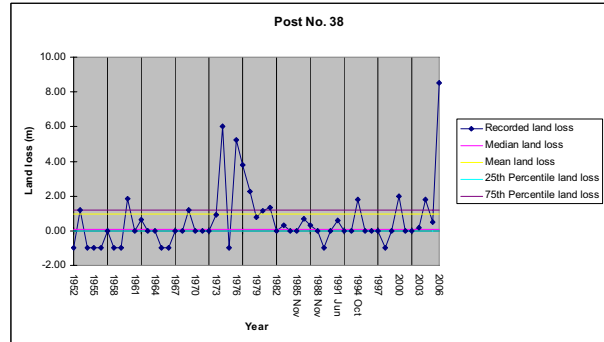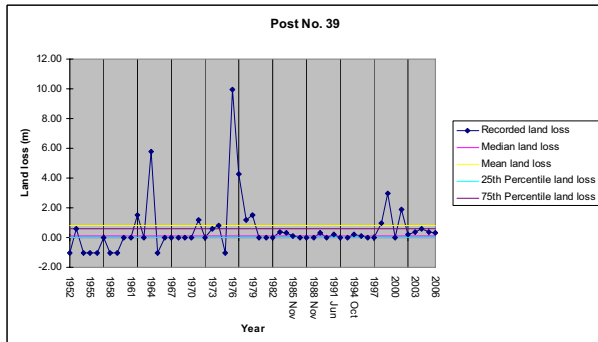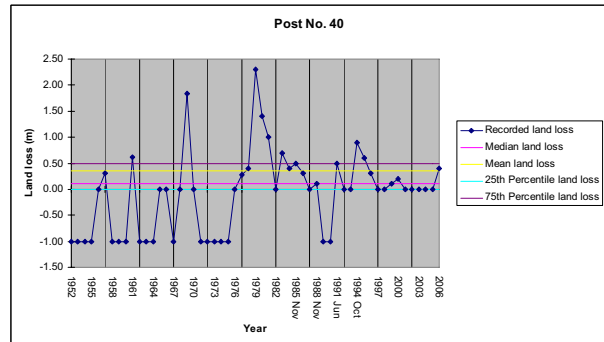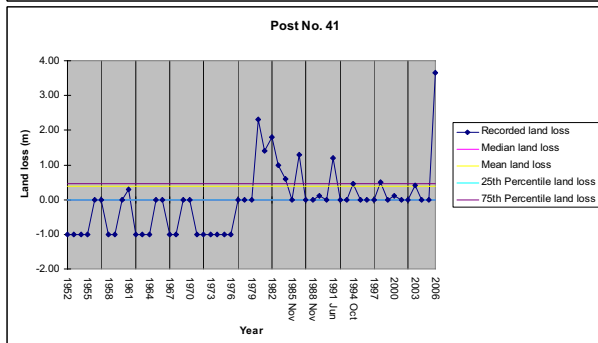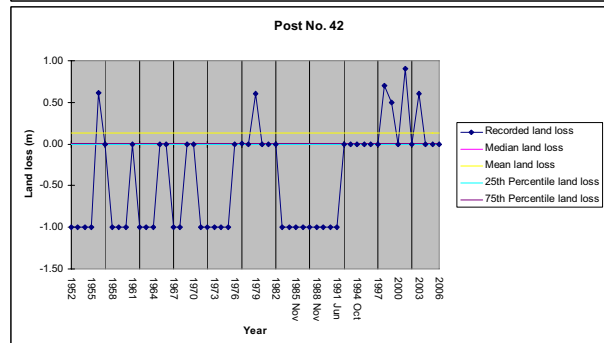

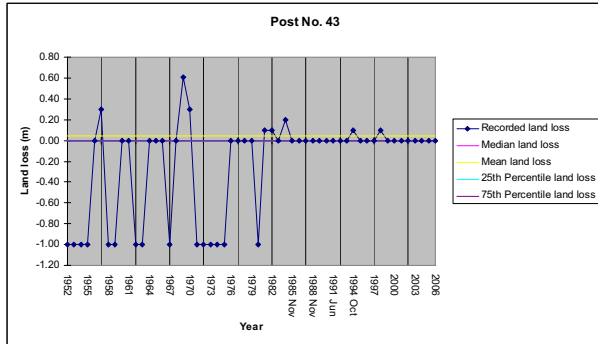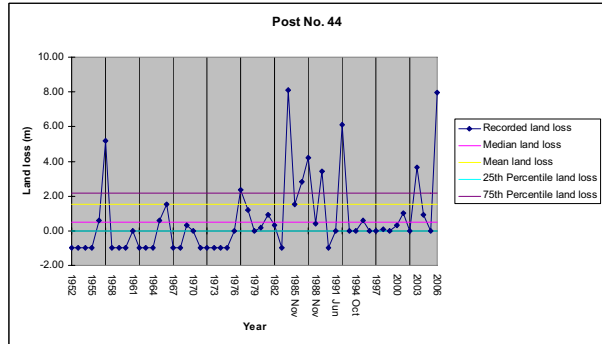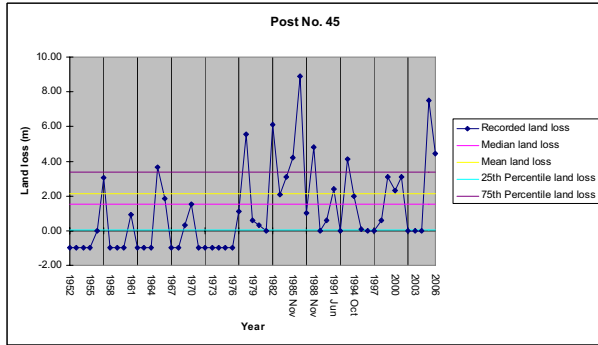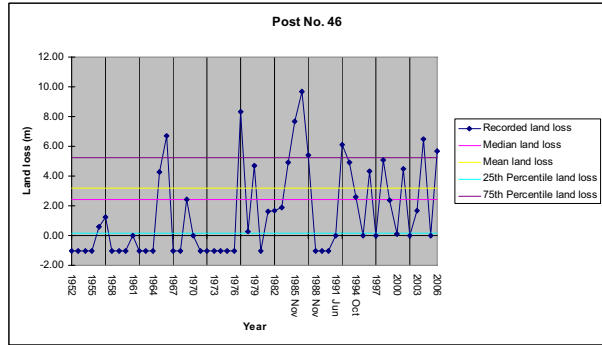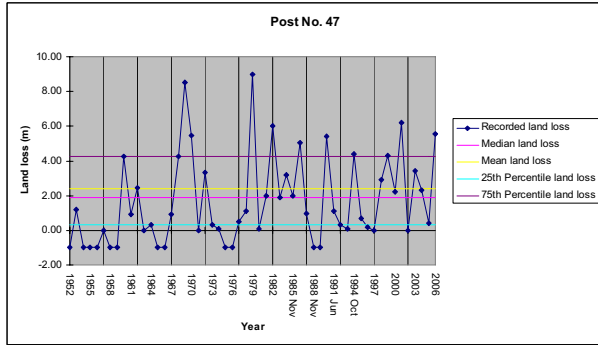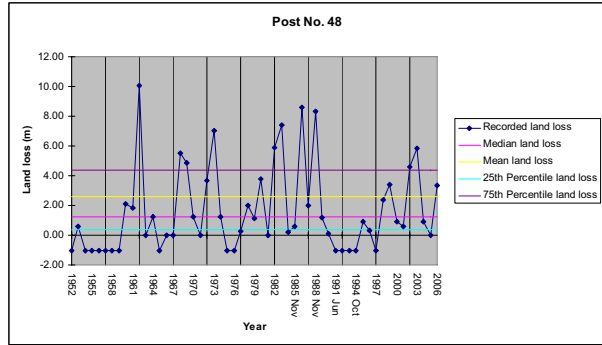

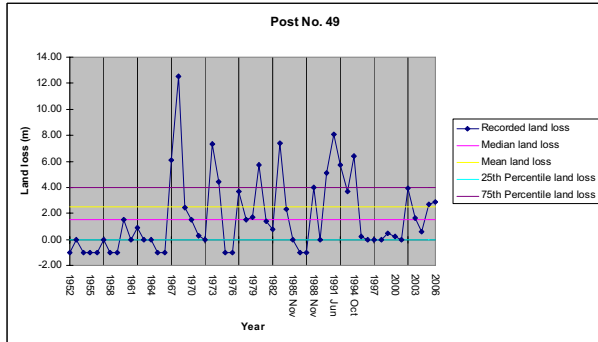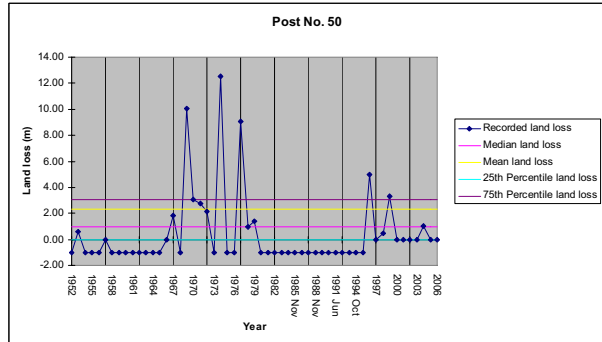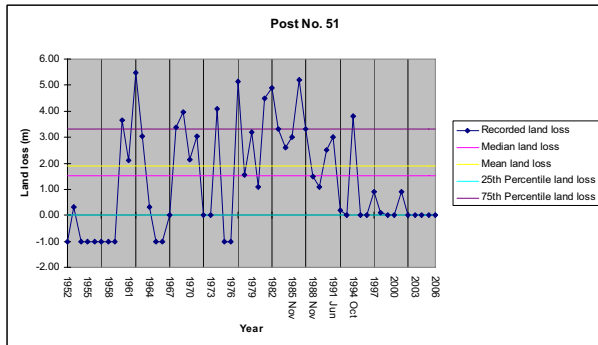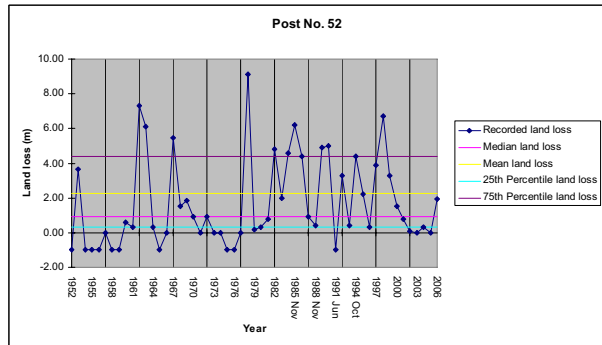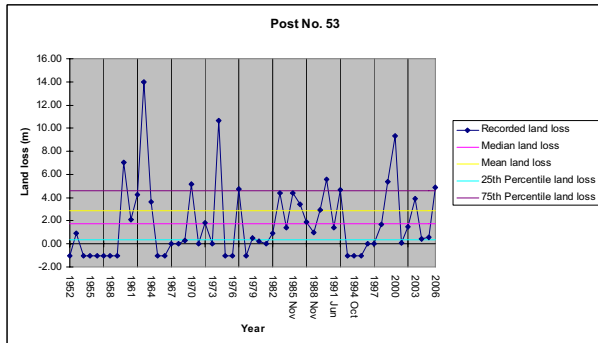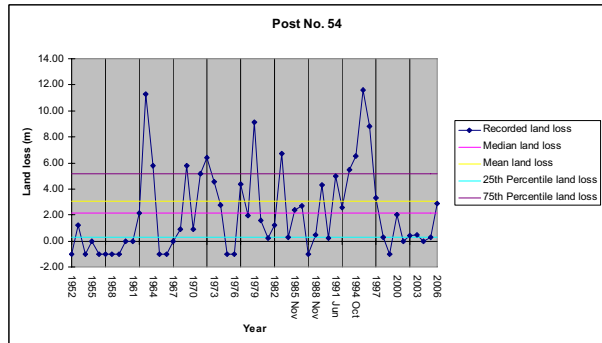

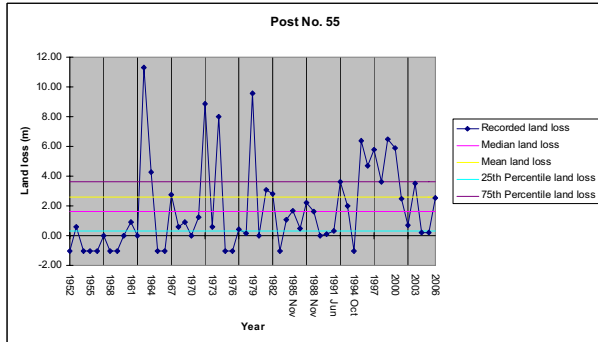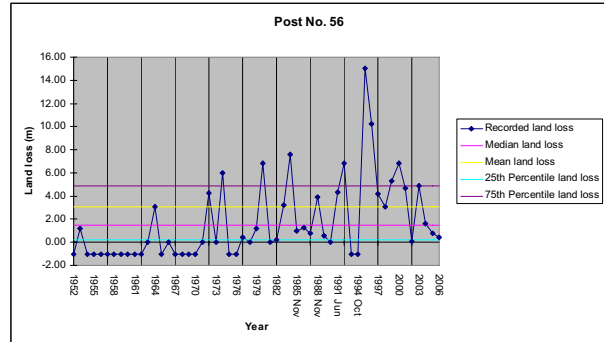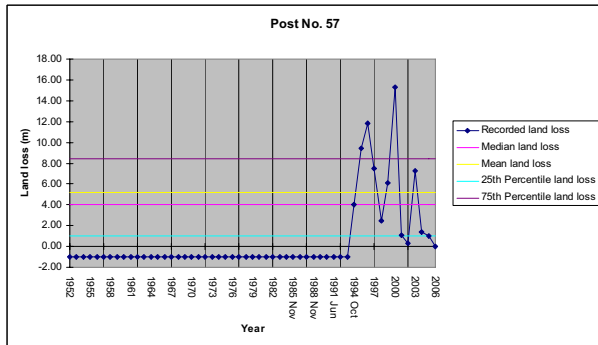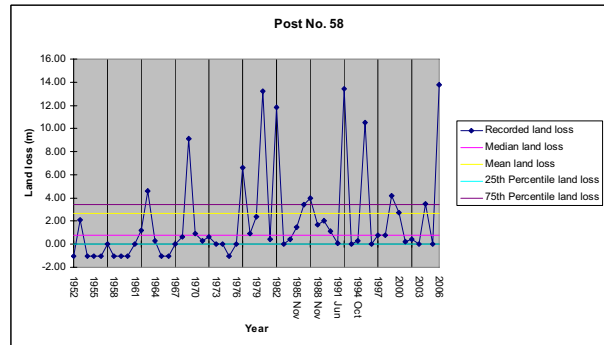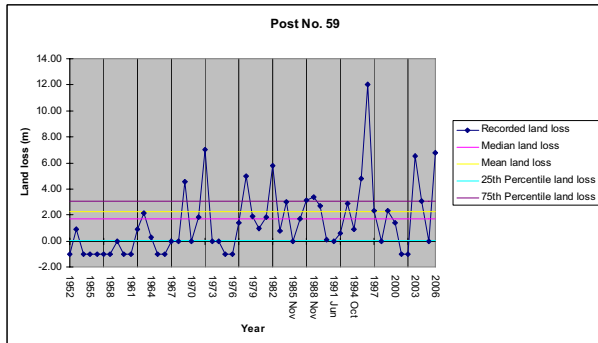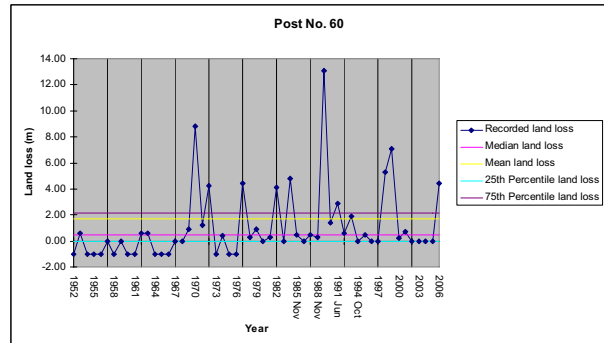

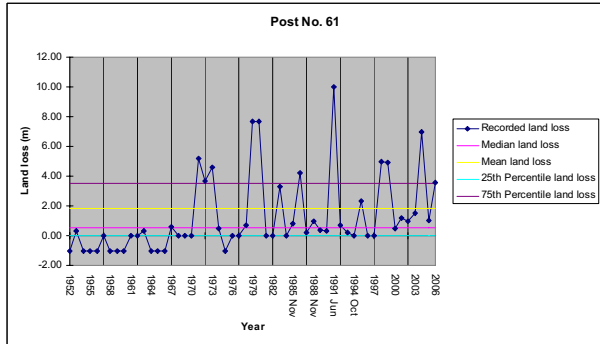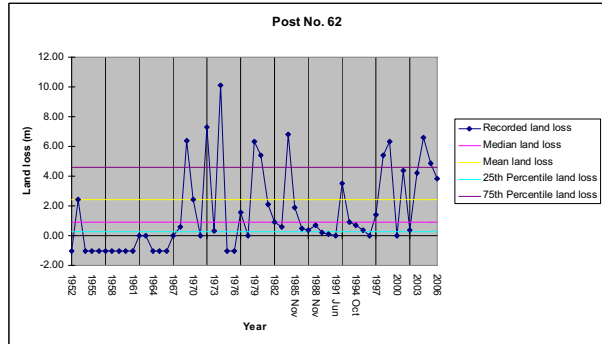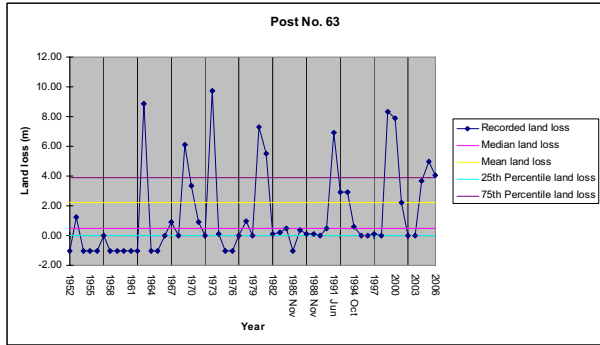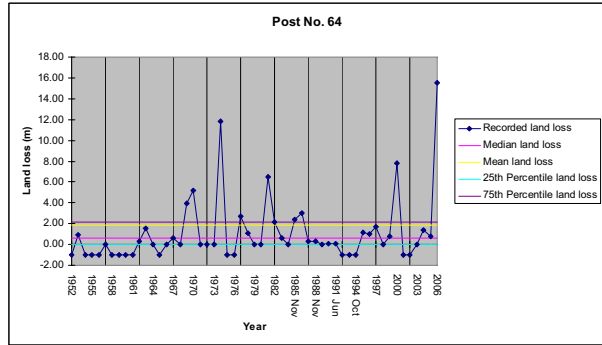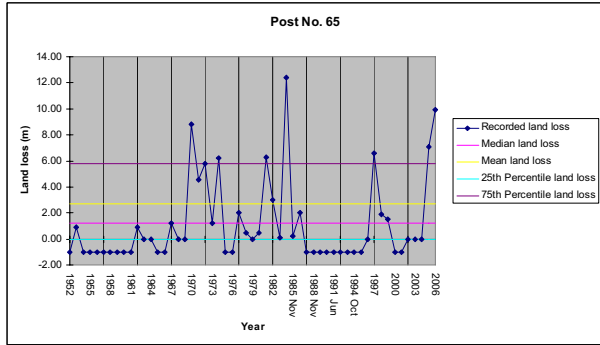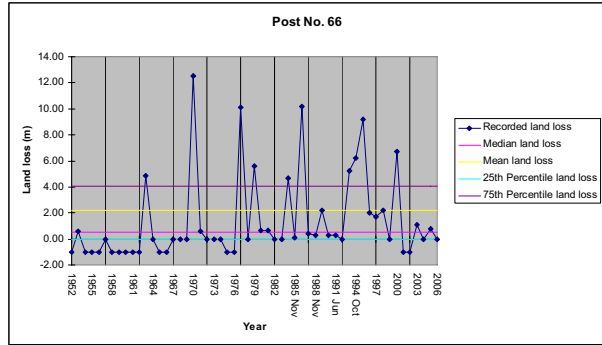

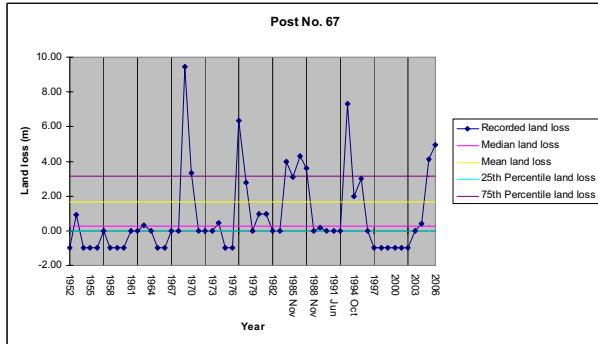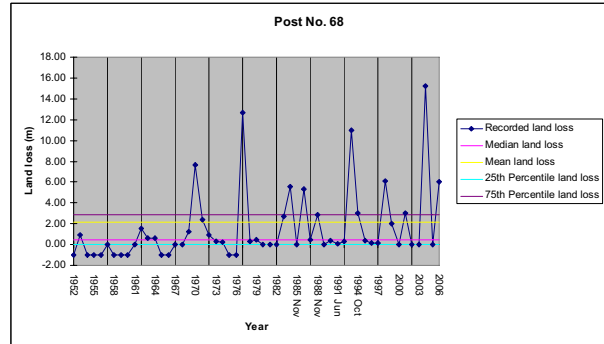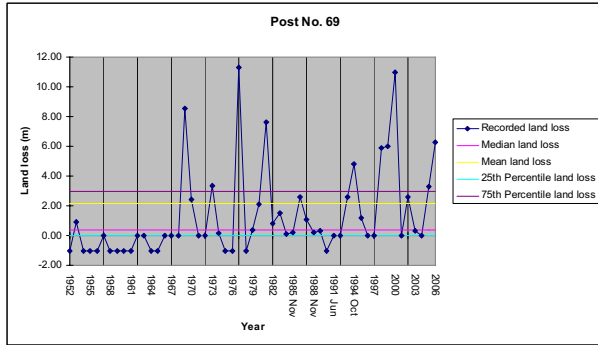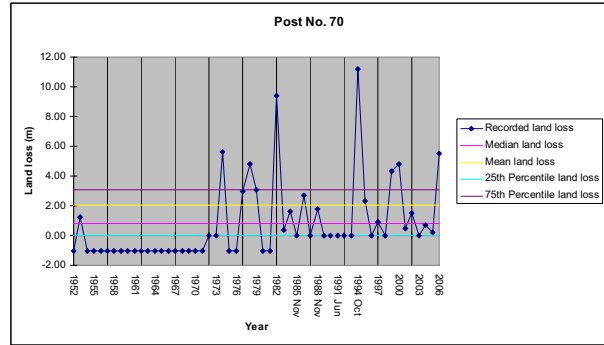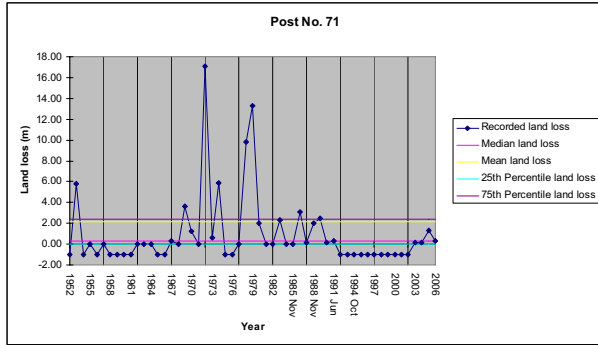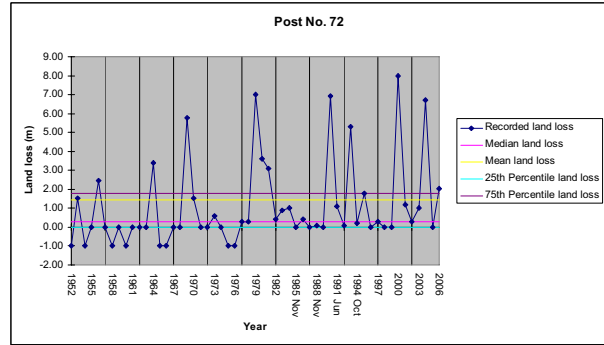

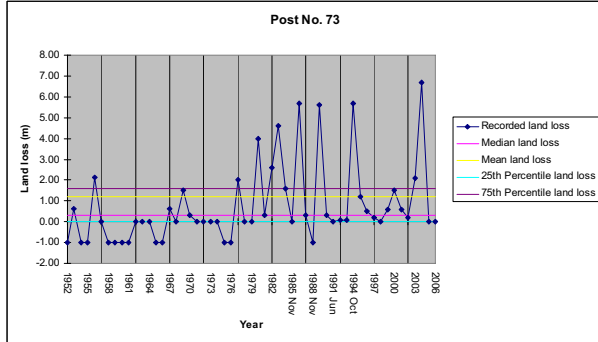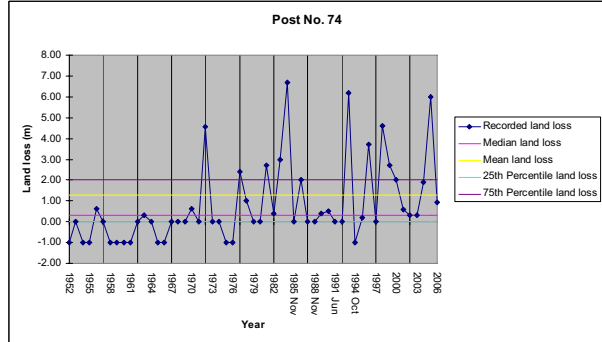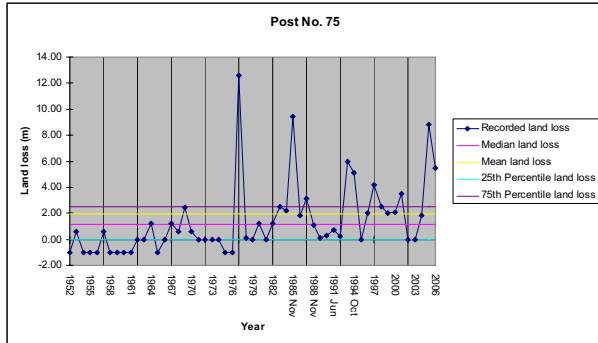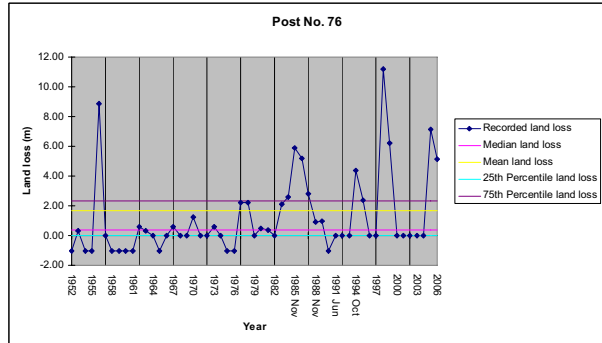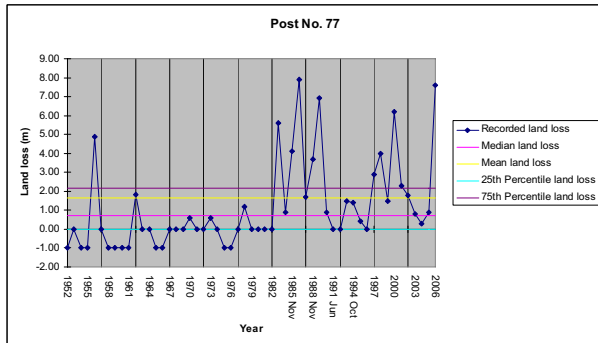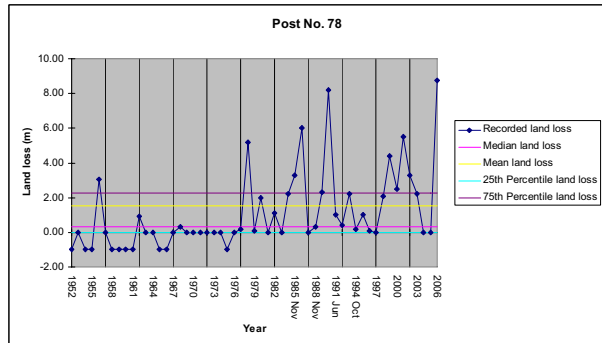

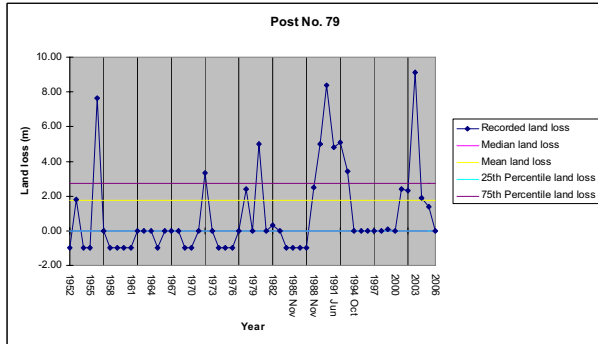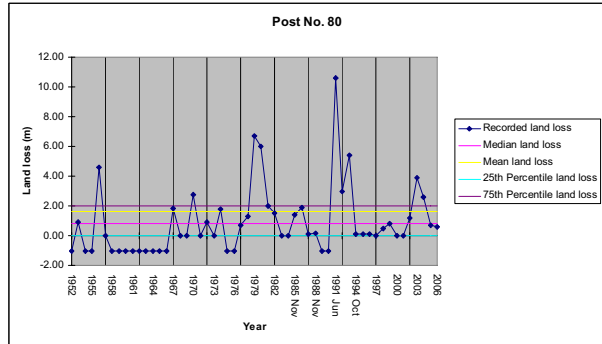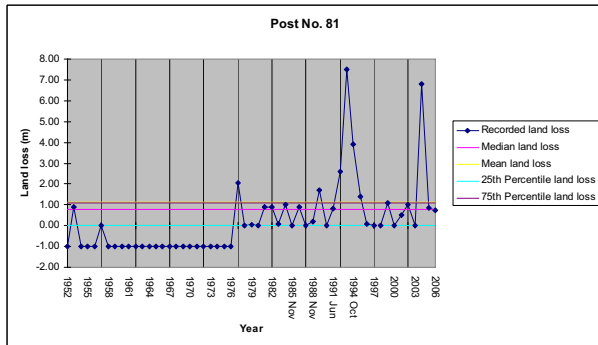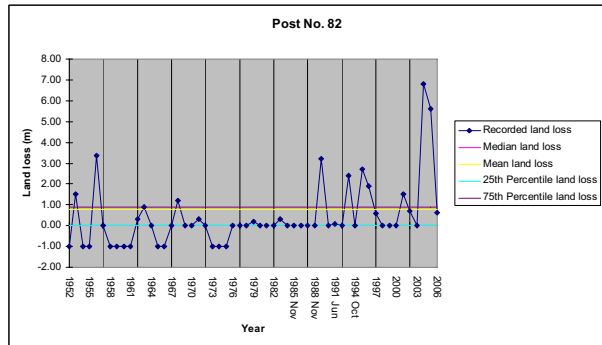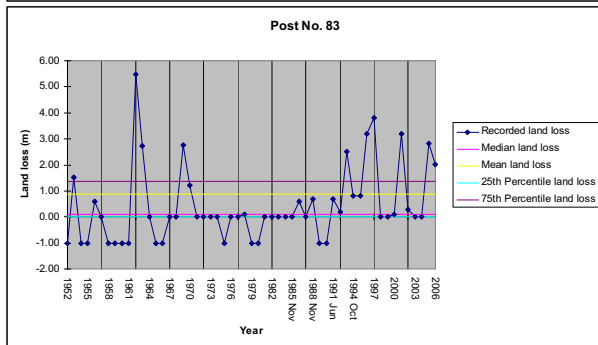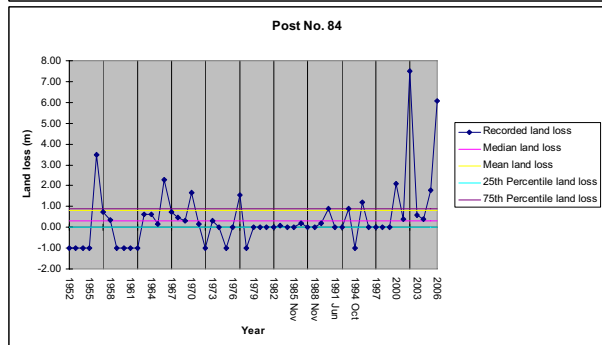



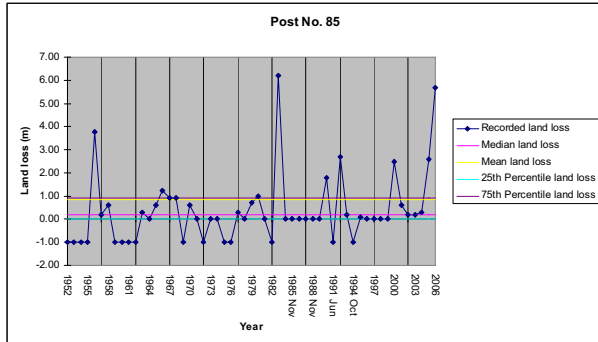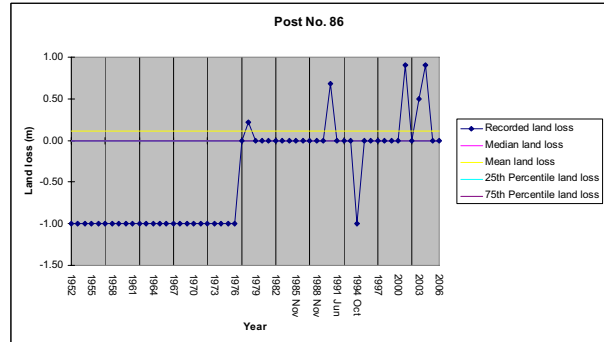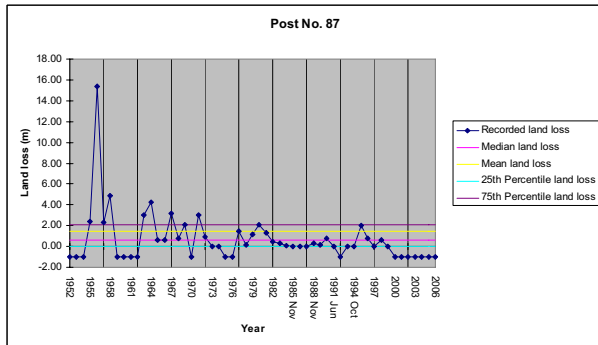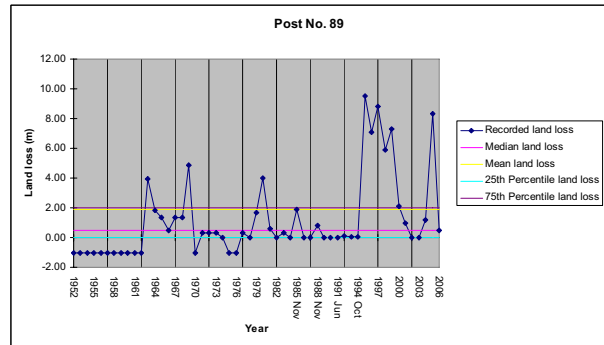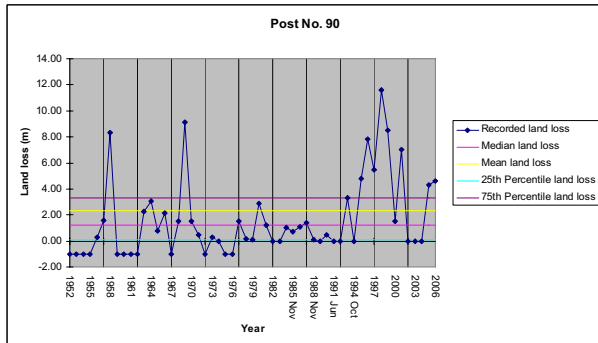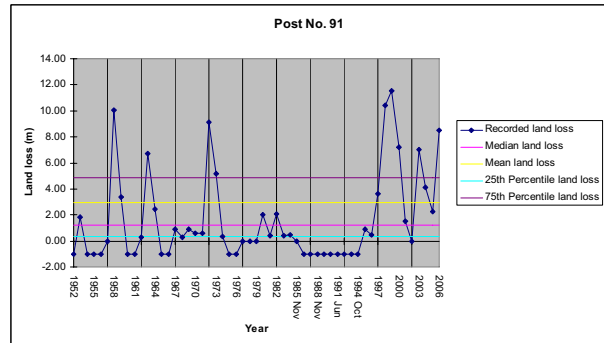

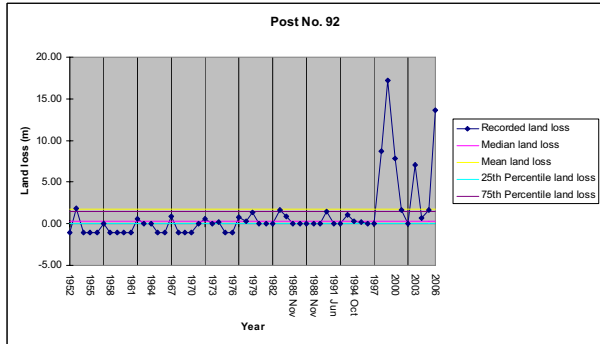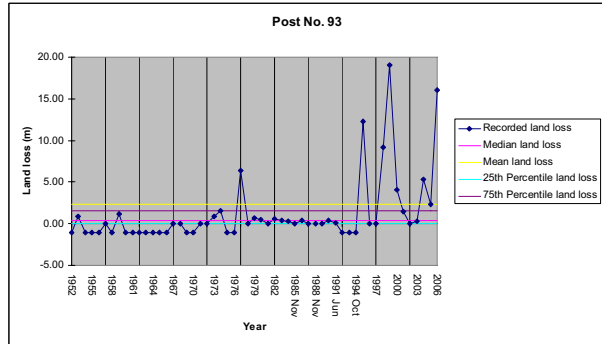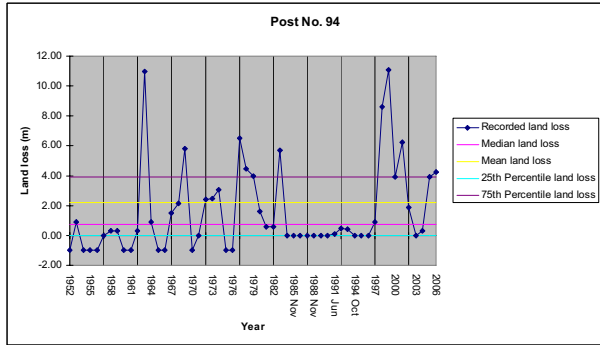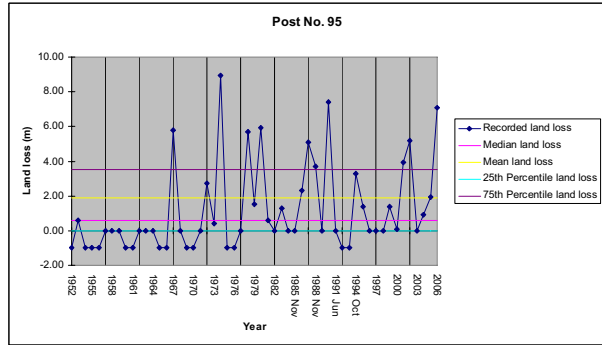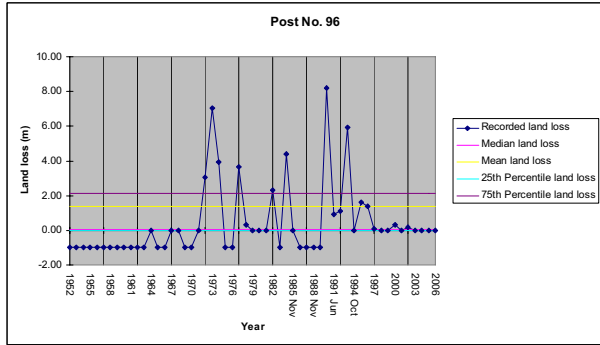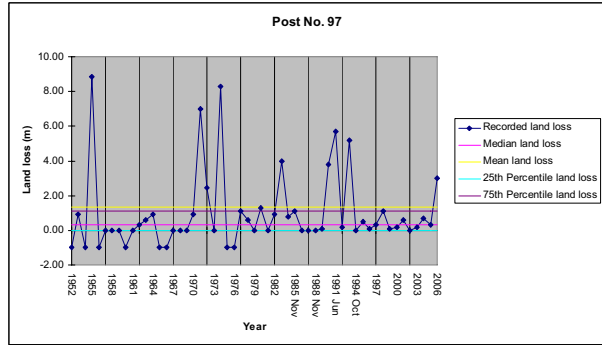

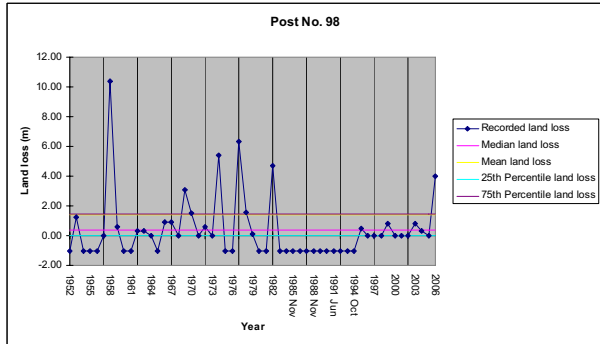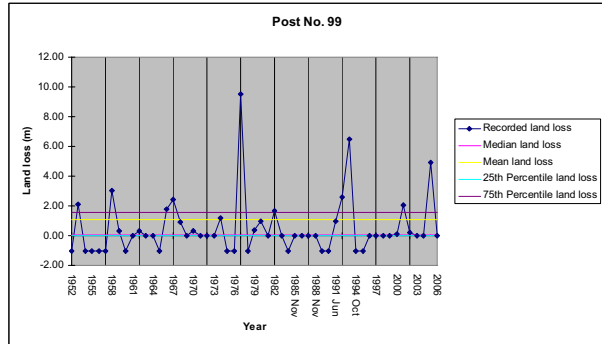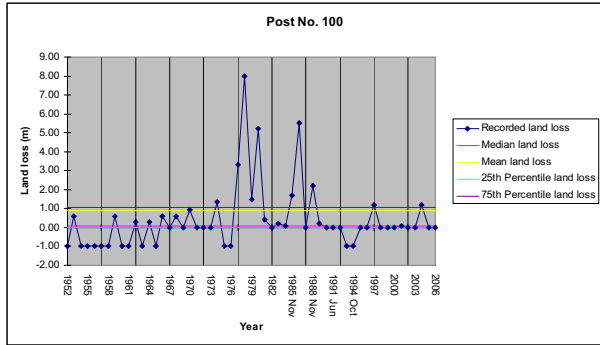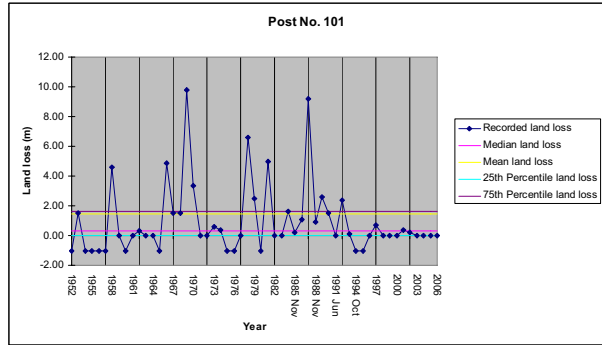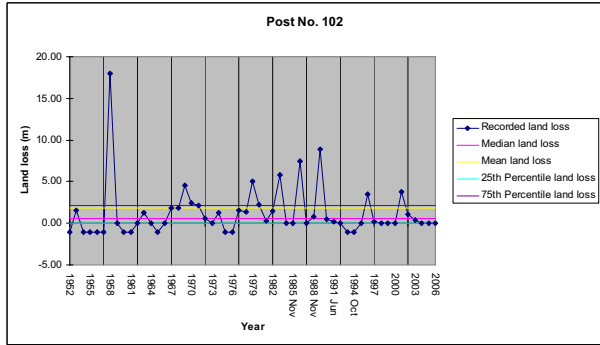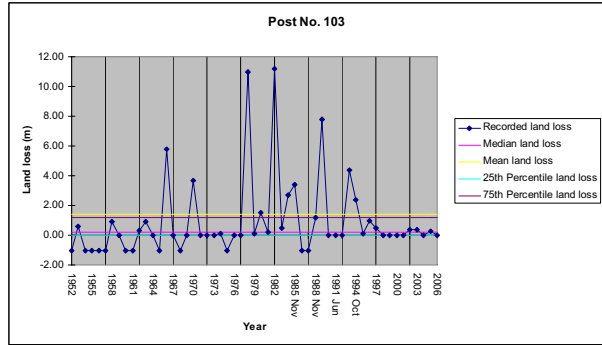

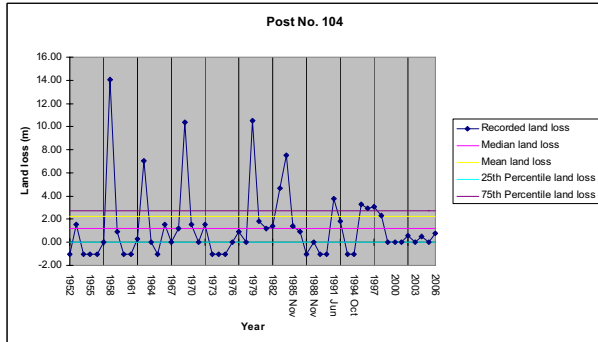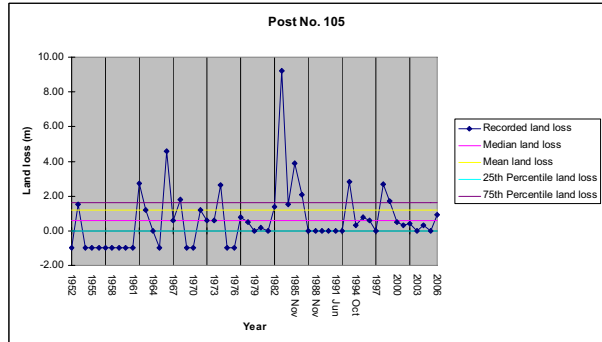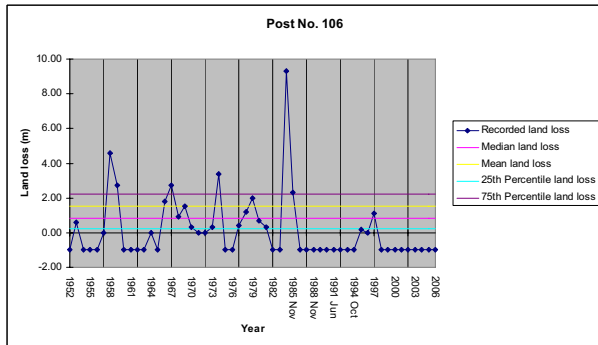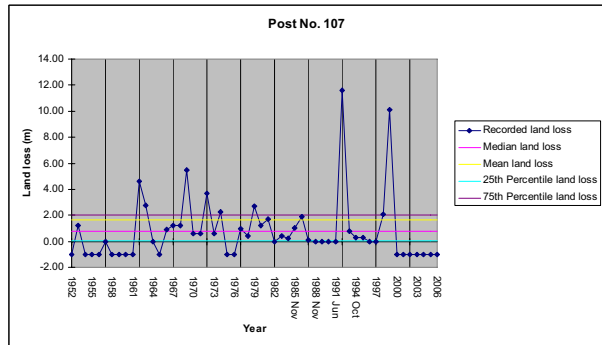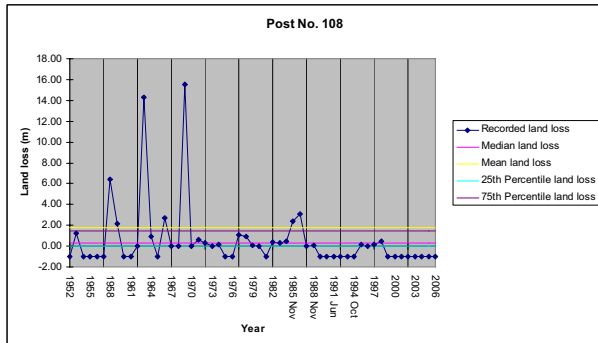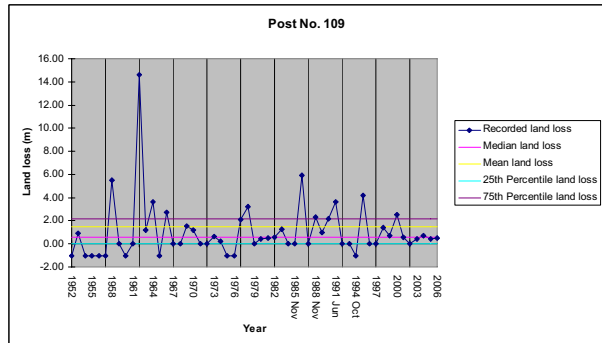

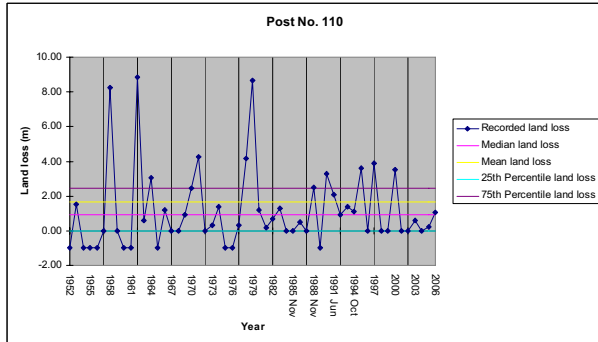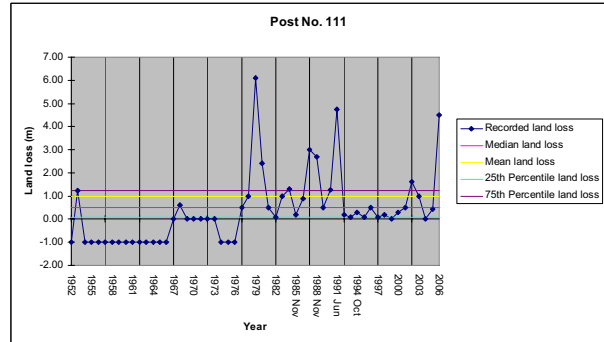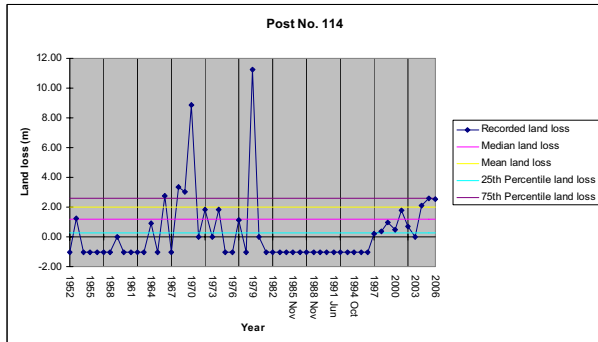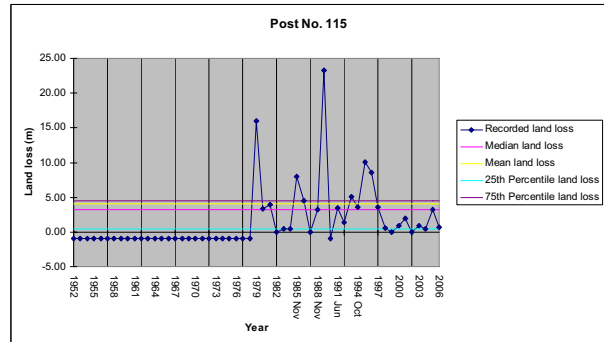

Supplement: Supplementary file 1 [file 1]
